# Supplementary material for: Ion-specific effect on dynamics of polyelectrolyte chains
Source: Royal Society of Chemistry journal article supplement (doi:10.1039/c2cp40077d), 2012-01-01
Supplement: c2cp40077d.pdf [file c2cp40077d.pdf]

## Supplementary Information

### Ion-specific Effect on Dynamics of Polyelectrolyte Chains

Zhenli Luo <sup>a</sup>, Xiaoyan Wang <sup>a</sup>, and Guangzhao Zhang <sup>\*ab</sup>

<sup>a</sup> *Hefei National Laboratory for Physical Sciences at Microscale, Department of Chemical Physics, University of Science and Technology of China, Hefei, 230026, P. R. China.*

<sup>b</sup> *Faculty of Materials Science and Engineering, South China University of Technology, Guangzhou, 510640, P. R. China.*

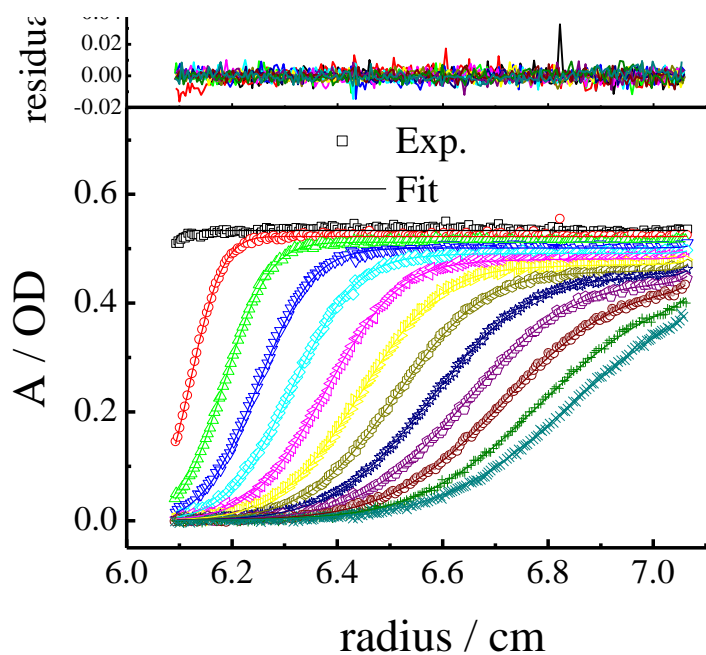

Figure S1: Sedimentation velocity (SV) analysis of QP4VP1 (every 10th scan loaded). Data were recorded at 275 nm. QP4VP1 concentration and NaCl concentration are 0.20 mg/mL and 0.10 M, respectively, the fit RMSD is smaller than 0.005. (a) The collected data (discrete points) and fit data (solid line); (b) Fit residual.

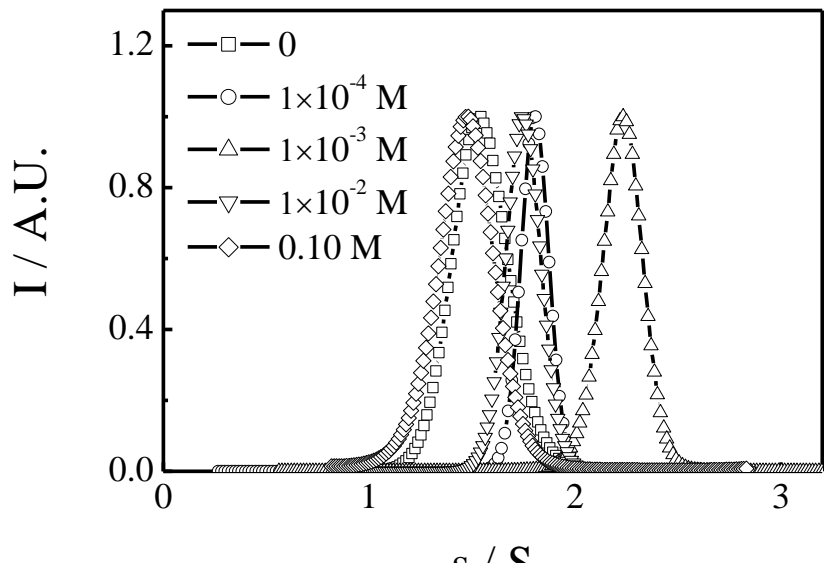

Figure S2: Sedimentation coefficient ( $s$ ) distributions of QP4VP1 in different NaCl concentration ( $C_s$ ) solutions. It shows that QP4VP1 has a unimodal distribution in salt-free or NaCl solution.

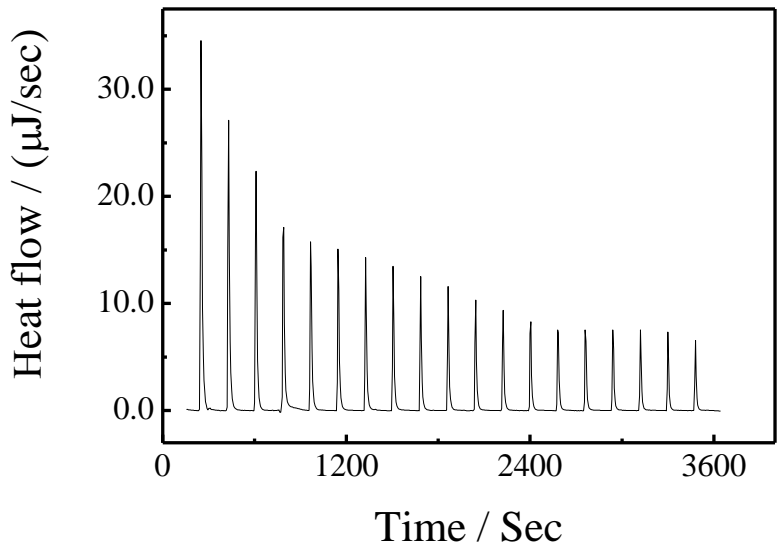

Figure S3: Time dependence of heat flow for QP4VP1 solution with a concentration of 0.20 mg/mL titrated with NaCl solution (0.10 M) at 20.0 °C, where the titration of water with 0.10 M NaCl is used as the reference.
